# Detecting SARS-CoV-2 Cryptic Lineages using Publicly Available Whole Genome Wastewater Sequencing Data

Reinier Suarez<sup>1</sup>, Devon A. Gregory<sup>1</sup>, David A. Baker<sup>2</sup>, Clayton Rushford<sup>1</sup>, Torin Hunter<sup>1</sup>, Nicholas R. Minor<sup>2</sup>,  
Clayton Russ<sup>1</sup>, Emma Copen<sup>1</sup>, David H. O'Connor<sup>2</sup>, Marc C. Johnson<sup>1\*</sup>

<sup>1</sup>Department of Molecular Microbiology and Immunology, University of Missouri-School of Medicine,  
Columbia, Missouri, United States of America.

<sup>2</sup>Department of Pathology and Laboratory Medicine, University of Wisconsin-Madison, Madison, Wisconsin,  
United States of America

\*marcjohanson@missouri.edu (MCJ)

## Abstract

Beginning in early 2021, unique and highly divergent lineages of SARS-CoV-2 were sporadically found in wastewater sewersheds using a sequencing strategy focused on the most mutagenic region of SARS-CoV-2, the receptor binding domain (RBD). Because these RBD sequences did not match known circulating strains and their source was not known, we termed them “cryptic lineages”. To date, more than 20 cryptic lineages have been identified using the RBD-focused sequencing strategy. Here, we identified and characterized additional cryptic lineages from SARS-CoV-2 wastewater sequences submitted to NCBI’s Sequence Read Archives (SRA). Wastewater sequence datasets were screened for individual sequence reads that contained combinations of mutations frequently found in cryptic lineages but not contemporary circulating lineages. Using this method, we identified 18 cryptic lineages that appeared in multiple samples from the same sewershed, including 12 that were not previously reported. Partial consensus sequences were generated for each cryptic lineage by extracting and mapping sequences containing cryptic-specific mutations. Surprisingly, seven of the mutations that appeared convergently in cryptic lineages were reversions to sequences that were highly conserved in SARS-CoV-2-related bat Sarbecoviruses. The apparent reversion to bat Sarbecovirus sequences suggests that SARS-CoV-2 adaptation to replicate efficiently in respiratory tissues preceded the COVID-19 pandemic.

## Author Summary

Wastewater surveillance has been used during the SARS-CoV-2 pandemic to monitor viral activity and the spread of viral lineages. Occasionally, SARS-CoV-2 sequences from wastewater reveal unique evolutionary advanced lineages of SARS-CoV-2 from an unknown source, which are termed cryptic lineages. Many groups nationwide also use wastewater surveillance to track the virus and upload that information to NCBI’s SRA database. That sequence data was screened to identify 18 cryptic lineages worldwide and identify convergent mutations throughout the genome of multiple cryptic lineages that suggest reversion to residues common in SARS-CoV-2-related Sarbecoviruses.

## 14 **Introduction**

15 Wastewater surveillance has been widely used to identify chemicals and microbes (1–3). During the SARS-  
16 CoV-2 pandemic, this technique gained prominence for its efficient tracking of various variants of concern (4).  
17 Our group began tracking SARS-CoV-2 lineages from wastewater in early 2021, and in March 2021, we  
18 discovered the first instance of an evolutionarily advanced SARS-CoV-2 receptor binding domain (RBD)  
19 haplotype that appeared repeatedly in a single sewershed, which we later termed a “cryptic lineage” (5).  
20 Examples of cryptic lineages have now been reported worldwide (5–11). Similarities between genomes from  
21 persistent SARS-CoV-2 infections in immunocompromised patients and cryptic lineages suggest these may  
22 reside within immunocompromised individuals (8,12,13). Furthermore, a single cryptic lineage derived from a  
23 lineage that stopped circulating in early 2021 was traced to a commercial building in late 2022, and 12S  
24 ribosomal RNA sequencing of the wastewater indicated that the only meaningful species contributing to the  
25 wastewater was human (13). Therefore, cryptic lineages are believed to be derived from individuals with very  
26 long SARS-CoV-2 infections.

27  
28 Cryptic lineages often forecast mutations that are eventually acquired by circulating lineages. For instance,  
29 Spike substitutions N440K, S477N, E484A, and Y505H had not been seen in any major circulating lineages  
30 prior to Omicron. Yet, these mutations had repeatedly appeared in cryptic lineages long before Omicron  
31 emerged (5,6). The convergence between mutations found in cryptic lineages and those eventually found in  
32 circulating lineages suggests that cryptic lineages and major circulating lineages share selective pressures.  
33 However, many of the mutations seen repeatedly in cryptic lineages have yet to become prominent in any major  
34 circulating lineage (13). It is unknown whether major circulating lineages will eventually acquire those  
35 mutations or whether those mutations account for selective pressures that differ from circulating lineages.

36  
37 Many organizations worldwide use whole genome sequencing (WGS) to detect and identify SARS-CoV-2  
38 variants in wastewater samples. Much of this data is uploaded to the National Center for Biotechnology

It is made available under a [CC-BY 4.0 International license](https://creativecommons.org/licenses/by/4.0/).

Information's (NCBI) Sequencing Read Archive (SRA) or one of its international equivalents, the International Nucleotide Sequence Database Collection (INSDC). In this report, we screen 135,672 samples from over 2,000 sites across 45 countries and demonstrate the feasibility of screening the SRA database to detect SARS-CoV-2 cryptic lineages and analyze their mutations.

## Results

Using conservative thresholds, our lab has identified over 20 cryptic lineages by amplifying the RBD sequence from SARS-CoV-2 RNA in wastewater samples (5,6,13). From previously discovered cryptic lineages, we compiled a list of mutations observed in multiple cryptic lineages that had not yet been detected in any Omicron circulating lineage (S1 Figure). This list of 69 amino acid substitutions was termed "cryptic lineage-defining amino acid substitutions"

Using the search terms "SARS-CoV-2 wastewater", we downloaded wastewater SARS-CoV-2 sequence reads from SRA that were available on February 18th, 2024, that had sample collection dates on or before October 31 2023, mapped these reads to the SARS-CoV-2 genome (NC\_045512), and processed them with the program SAM Refiner (14). We identified individual sequencing reads in the SRA datasets that contained at least two of the cryptic lineage-defining amino acid substitutions (S1 Data). These were analyzed manually to identify haplotypes that did not match any known sequence from a patient sample and appeared multiple times in samples from the same sewershed. Using the subset of identified sequences, we found sequencing reads consistent with 18 independent cryptic lineages. Of the 18 identified lineages, three of the lineages we reported previously and three of the lineages had been reported by other groups (5–7,9,11,13). The duration of detection varied widely among the cryptic lineages; the shortest time a cryptic lineage was detected was one month (CA-1 and NY-2), while two cryptic lineages were detected for over a year (UK-1 and WI-1) (Table 1).

It is made available under a [CC-BY 4.0 International license](https://creativecommons.org/licenses/by/4.0/).

After cryptic lineages are identified based on their RBD sequence, we can retrospectively identify other datasets from the same sewershed that share cryptic-defining characteristics outside of the RBD to partially reconstruct lineage genomes. We compared the individual SARS-CoV-2 sequences present in wastewater samples from sewersheds containing cryptic lineages to the sequences from samples from neighboring (same state) sewersheds collected during the same time period and, when possible, sequenced by the same agency (S2 and S3 Data). Individual mutations that appeared in multiple samples from the cryptic sewershed and were at least 50x more prevalent in the cryptic containing sewershed than in neighboring sewersheds were considered putatively cryptic-specific mutations (Figure 1a). Additionally, any mutation frequently appearing in the same sequence read as the cryptic-specific mutation was presumed to be present in the cryptic lineage (Figure 1b; see methods for specific criteria). This process was repeated with all 18 cryptic lineages to approximate the polymorphisms present in each lineage (S4 and S5 Data). A consensus sequence was generated for each cryptic lineage using its cryptic-specific mutations and sequences that appeared on the same read as the cryptic-specific mutations (Figure 1b, S6 Data File). Generating a complete consensus sequence for each cryptic lineage proved challenging. Sequence coverage varied between cryptic lineages, with the highest coverage being 73.97% (MI-1) and the lowest 11.43% (CO-1). The consensus sequence was used as inputs for the phylogenetic software programs UShER (15) and Nextclade (16) to determine its predicted parent SARS-CoV-2 lineage (Table 1). All the cryptic lineages were predicted to be derived from lineages that stopped circulating months to years prior to their detection in wastewater (Table 1). A phylogenetic tree of the cryptic lineages illustrates the extreme diversity of these lineages (Figure 2). The use of a consensus sequence, which is derived from a mixture of diverse lineages with a shared common ancestor, could potentially influence the branch lengths in the phylogenetic tree, and may not fully capture the true diversity within each cryptic lineage.

Interestingly, we observed the same mutations in the consensus sequence appearing in multiple independent cryptic lineages. Such convergent changes are unlikely to be sequencing artifacts and likely reflect adaptation to common selective pressures. Mutations that appeared in three or more cryptic lineages were mapped onto a

It is made available under a [CC-BY 4.0 International license](https://creativecommons.org/licenses/by/4.0/).

18 diagram of the SARS-CoV-2 genome while excluding mutations found in the parent lineages (Figures 3a & b;  
19 S7 Data). We observed 83 nucleotide changes in at least three cryptic lineages. The most common changes in  
20 Spike were K417T (78%) and Q493K (56%), which are known to affect antibody escape and ACE2 binding  
21 (17,18). Although K417T was present in the Gamma variant of concern and a few Omicron sub-lineages, such  
22 as BA.2.18, it has been present in less than 1% of circulating lineages found in people. By contrast, Q493K is  
23 extremely rare and has not been a lineage-defining change in any named PANGO lineage. The most common  
24 cryptic-specific mutations outside the Spike were in Orf1a (K1795Q) and Orf3 (H182D), each observed in 50%  
25 of the identified cryptic lineages.

26  
27 Among the 83 changes that occurred convergently in at least three cryptic lineages, 79 changed a protein  
28 sequence through non-synonymous changes or deletions. Of the four changes that did not alter a protein  
29 sequence, two were silent (C25162A/Spike: L1200L, 22.22%), and three were in non-coding regions (T78A  
30 (16.67%), A178G (16.67%), and T29758G (33.33%)). Interestingly, we observed that the Spike change  
31 C25162A (L1200L) was always associated with the neighboring C25163A (Q1201K) change. These two  
32 mutations together create the sequence TCTAAAAGAACT, which is a near-perfect match to the consensus  
33 SARS-CoV-2 transcription regulatory sequence (TRS) TCTAAACGAACT (19). Although C25162A and  
34 C25163A are relatively rare in patient sequences, the two changes usually occur together (>60% of the time).  
35 While the function of this additional TRS is not known, it is a likely explanation for the convergence of the  
36 silent C25162A change.

37  
38 A particularly notable convergent non-coding change in the cryptic lineages is at the 3' UTR of the SARS-CoV-  
39 2 genome, T29758G. This mutation is in the highly conserved region of the stem-loop two motif (s2m), which  
40 is found in many Coronaviruses and other RNA viruses (20–22). Remarkably, the s2m in SARS-CoV-2  
41 deviates from the consensus s2m found in other RNA viruses, including Sarbecoviruses, and the T29758G  
42 mutation restores the SARS-CoV-2 to the consensus s2m sequence (22,23). The s2m stem-loop is not essential

It is made available under a [CC-BY 4.0 International license](https://creativecommons.org/licenses/by/4.0/) .

for replication as the sequence was deleted in omicron lineage BA.2 and all of its derivatives; thus, it has been nearly absent in circulating lineages for over two years (24). However, in the case of the cryptic lineages, the sequence frequently reverts the SARS-CoV-2 s2m to the Sarbecovirus consensus sequence.

Several of the most common convergent changes in cryptic lineages, such as Orf1a: K1795Q and T29758G, were conversions to the sequence found in closely related bat Sarbecoviruses such as RaTG-13. Although SARS-CoV-2 is a human respiratory pathogen, the most closely related Sarbecoviruses primarily infect Horseshoe bats and are primarily believed to be enteric pathogens. To explore if other convergent changes in cryptic lineages represent reversions to the Sarbecovirus consensus sequence, the sequences of seven closely related Sarbecoviruses (RpYN06, RATG-13, BANAL-52, BANAL-103, BANAL-116, and BANAL247) were compared to SARS-CoV-2 to identify amino acid positions that were conserved across all seven sarbecoviruses, but differed in the original SARS-CoV-2 A and B lineages. A total of 26 substitutions were identified where the SARS-CoV-2 sequence differed from all seven of the bat sarbecoviruses. Of these 26 positions, 12 substitutions in cryptic lineages had reverted to the Sarbecovirus consensus sequence in at least one cryptic lineage, and seven of the reversions occurred in at least three cryptic lineages (Figure 4). As of October 31st, 2023, in these 26 positions only one substitution that reverted to the Sarbecovirus sequence (ORF1a: A3143V) appeared in over 1% of all in-patient SARS-CoV-2 sequences. This high frequency of reversion to the consensus bat sarbecovirus sequence in cryptic lineages but not circulating lineages is consistent with cryptic lineages being subject to similar selective pressures as that of its bat progenitors.

Five of the cryptic lineages were found to have small insertions (Figure 5). Three of the insertions occurred in the ectodomain of the structural proteins, specifically in the spike and M genes, as was previously noted for one cryptic lineage, and the other two insertions occurred in non-structural genes, ORF3a and ORF7a (13). A closer observation of the inserted nucleotide sequence revealed that four of the five insertions were duplicated sequences from other parts of the SARS-CoV-2 genome.

58  
59 One cryptic lineage was detected in SRA datasets from two different sewersheds separated by approximately 40  
60 miles. Samples were independently obtained from both sewersheds and tested for the presence of the cryptic  
61 lineage. Samples from both sewersheds contained a cryptic lineage that closely matched the sequence observed  
62 in the SRA sequences (S2 and S3 Figure). Similarly to the cryptic lineage found in Wisconsin (WI-1), the  
63 sequence from the Ohio cryptic lineage did not remain static over a nine-month period (Figure 6). Both  
64 sewersheds from Ohio shared highly similar cryptic-specific mutation profiles throughout the dates detected in  
65 the SRA. Notably, mutations in the Spike protein N460K, F486P, Q493T, and P499T were detected for the first  
66 time on the same date from both sewer sheds, strongly suggesting this lineage was being deposited into  
67 wastewater from a single source, likely a person that commuted between both locations. The Ohio cryptic  
68 lineage persisted until June 2023 before disappearing.

## 69 70 71 72 73 74 75 76 77 78 79 80 **Discussion**

81 Screening NCBI's SRA database for cryptic lineages underestimates the prevalence of these lineages. Our  
82 screen relies on the detection of specific changes that are common to cryptic lineages, but there may be other  
83 cryptic lineages that do not harbor these conserved cryptic lineage signatures. Moreover, only a subset of global  
84 wastewater sequences are submitted to SRA, and the cryptic lineages need to be sufficiently abundant that their  
85 sequences can be detected after dilution with all of the other material in the sewershed. Despite these  
86 limitations, the method of cryptic lineage detection described here effectively detects cryptic lineages  
87 worldwide and highlights cryptic-specific polymorphisms outside the RBD. More importantly, this method  
88 illustrated cryptic-specific convergent polymorphisms across the many cryptic lineages.

89  
90 Five insertion sites occur in various parts of the SARS-CoV-2 genome, but the impacts of these insertions are  
91 unknown. The insertions occurring in the structural regions of the SARS-CoV-2 genome (spike and M genes)  
92 are in the ectodomain section of the proteins. Studies have shown that SARS-CoV anti-M, in conjunction with



It is made available under a [CC-BY 4.0 International license](https://creativecommons.org/licenses/by/4.0/) .

13 anti-Spike, enhances the neutralizing capability of the virus (25–27). Thus, these insertions may contribute to  
14 immunological escape, while the significance of the escape requires testing. The role of the insertions in ORF3a  
15 and ORF7a are unknown; however, it is evident that SARS-CoV-2 readily utilizes the strategy of insertions as a  
16 form of adaptation to different selection pressures.

17  
18 The K1795Q substitution is in the papain-like protease domain of nsp3 and the substitution has been shown to  
19 enhance the ability of the protease to cleave polyubiquitin chains (28). The most parsimonious explanation for  
20 the reversion of sequences in cryptic lineages to the sequence found in closely related Sarbecoviruses is that  
21 cryptic lineages are subject to selective pressures in common with enteric bat Sarbecoviruses that are not  
22 imposed on circulating lineages of SARS-CoV-2 that are primarily respiratory. The observation that enteric  
23 viruses consistently appear at >100 times higher levels than respiratory viruses in wastewater suggests that the  
24 digestive tract acts as a selective filter, diminishing much of the signal from respiratory viruses. This aligns with  
25 the observation that cryptic SARS-CoV-2 lineages, which are detected in wastewater and thought to originate  
26 from a single individual, are shed at extraordinarily high levels (13). The combined observations of cryptic  
27 lineages reverting to sequences found in their enteric ancestors, and their extremely high shed rates, are  
28 consistent with the idea that cryptic SARS-CoV-2 lineages predominantly replicate in the gastrointestinal (GI)  
29 tract.

30  
31 The observation that SARS-CoV-2 contains at least seven distinct substitutions that convergently changed to the  
32 sequence found in enteric Sarbecoviruses suggests a strong conditional selective pressure to maintain the  
33 Sarbecovirus consensus sequence at these positions. The fact that SARS-CoV-2 had changes at each of these  
34 positions when it began circulating in humans suggests that SARS-CoV-2 had replicated in a non-enteric  
35 environment for a long enough period of time to allow these substitutions to persist and become fixed in the  
36 viral genomes that started the COVID-19 pandemic.

## Methods

### NCBI SRA Screening

All SARS-CoV-2 sequencing reads were obtained through the NCBI's SRA and found by using the search terms "SARS-CoV-2 wastewater" then filtered to exclude any sample collected after October 2023. Raw reads were downloaded and mapped to the SARS-CoV-2 genome (NC\_045512) using Minimap2 (29) and the resulting sam file processed by SAM Refiner with the parameters '—wgs 1—collect 0—indel 0—covar 0—min\_count 1—min\_samp\_abund 0—min\_col\_abund 0—ntabund 0—ntcover 1'. Unique sequence outputs from SAM Refiner were programmatically screened for a combination of specific amino acid changes only found in cryptic lineages with positive hits manually validated. All scripts used in this study are publicly available through Github: [https://github.com/dholab/SRA\\_wastewater\\_lineages](https://github.com/dholab/SRA_wastewater_lineages).

### Cryptic-Specific Polymorphisms

To assess polymorphisms from sequence read runs (SRRs) containing cryptic lineages, we compared the sequences from sewer sheds containing cryptic lineages to sequences from neighboring (sewer sheds from the same state) sewer sheds that did not contain cryptic lineages. Two non-cryptic SRRs (negative samples) were compared against an SRR with a cryptic sequence. We selected negative and positive samples processed by the same sequencing agency to rule out testing bias. The selected SRRs were then processed using SAM Refiner, and the unique\_seq and covar outputs were processed by a custom script to determine mutations associated with each cryptic lineage. The parameters for each cryptic-specific mutation are as follows: 1) The mutation must be present in SRA reads from two or more samples from a sewer shed where a cryptic lineage was observed; 2) the average sum abundance for the mutation must be 50x greater in the cryptic sewer sheds than in the non-cryptic sewer sheds; 3) a sum abundance of >10% of the maximum sum abundance of the most abundant polymorphism for a cryptic-specific mutation from those sewer shed samples. To account for mutations prevalent in both circulating and cryptic lineage, any polymorphism appearing at least 75% of the time in the

It is made available under a [CC-BY 4.0 International license](https://creativecommons.org/licenses/by/4.0/).

same sequence read as a cryptic-specific polymorphism is considered part of the cryptic lineage and reported as “linked.”

The script generates three files for each cryptic lineage: a “CommonVars” file that lists all the polymorphisms found in all the samples compared (S3 Data File), a “Cryptic\_CommonVars” file containing all the cryptic-specific mutations while flagging Delta, RaTG13, ubiquitous, and linked mutations (S4 Data File), and a “Cryptic\_Covar” file that lists all the polymorphisms that were linked to cryptic-specific polymorphisms (S5 Data File). The cryptic-specific polymorphisms are then aggregated into a new file, “SortedVariance,” using a script that sorts them based on their prominence in all the cryptic lineages (S7 Data File). The cryptic-specific polymorphisms with a prevalence of  $\geq 3$  across all the cryptic lineages were then mapped onto a diagram of the SARS-CoV-2 genome based on their respective site.

#### Ohio Cryptic Lineage Wastewater Sample Processing and RNA Extraction

24-hour composite samples of wastewater were collected weekly from the inflow of two undisclosed wastewater treatment facilities in Ohio. Samples arrived in 50mL conical tubes and were stored at 4°C until processed. Samples were centrifuged at 3000xg for 10 minutes and filtered through a 0.22µm polyethersulfone membrane (Millipore, Burlington, MA, USA). Approximately 37.5mL of wastewater was mixed with 12.5mL solution containing 50% (w/vol) polyethylene glycol 8000 and 1.2M NaCl, mixed, and incubated at 4°C. The samples would then be spun down at 12,000 RCF for 2 hours at 4°C. The supernatant was decanted, and the RNA was extracted from the remaining pellet using the QIAamp Viral RNA Mini Kit (Qiagen, Germantown, MD, USA) following the manufacturer’s instructions. The RNA was extracted in a final volume of 60uL.

#### Amplifying the Ohio Cryptic Lineage

The primary RBD RT-PCR was conducted using the Superscript IV One-Step RT-PCR System (ThermoFisher Scientific, 12594100, Waltham, MA, USA). Primary RT-PCR amplification was performed as follows: [25 °C

It is made available under a [CC-BY 4.0 International license](https://creativecommons.org/licenses/by/4.0/).

57 (2:00) + 50 °C (20:00) + 95 °C (2:00)] + [(95 °C (0:15) + 55 °C (0:30) + 72 °C (1:00)] × 25) cycles with the  
58 MiSeq primary PCR primers 5'-CAAACCTTCTAACTTTAGAGTCCAACC-3' and 5'-  
59 AAGTCCACAAACAGTTGCT-3'. An additional reaction was conducted to exclude omicron lineages utilizing  
60 the primer sets 5'-CCCTGATAAAGAACAGCAACC-3' and 5'-TATATAATTCCGCATCATTTTCCAC-3'.  
61 A secondary nested PCR (25µL) was performed on RBD amplifications using 5µL of the primary PCR as the  
62 template with MiSeq nested gene-specific primers containing 5' adapter sequences (0.5µM each). The MiSeq  
63 nested RBD primer set for amplifying all lineage amplicons is 5'-  
64 gtgactggagttcagacgtgtgctcttccgatctACTACTACTCTGTATGGTTGGTAAC-3' and 5'-  
65 acactctttcctacacgacgctcttccgatctCCTAATATTACAACTTGTGCCCTT-3'. The MiSeq nested RBD primer  
66 set for amplifying excluded omicron amplicons is 5'-  
67 acactctttcctacacgacgctcttccgatctGTGATGAAGTCAGACAAATCGC-3' and 5'-  
68 gtgactggagttcagacgtgtgctcttccgatctATGTCAAGAATCTCAAGTGTCTG-3', along with dNTPs (100µM each)  
69 (New England Biolabs, N0447L) and Q5 DNA polymerase (New England Biolabs, M0541S, Ipswich, MA,  
70 USA). Secondary PCR amplification was executed as follows: 95 °C (2:00) + [95 °C (0:15) + 55 °C (0:30) + 72  
71 °C (1:00)] × 20 cycles. A tertiary PCR (50µL) was conducted to add the adapter sequences necessary for  
72 Illumina cluster generation using forward and reverse primers (0.2µM each), dNTPs (200µM each) (New  
73 England Biolabs, N0447L, Ipswich, MA, USA), and Phusion High-Fidelity or (KAPA HiFi for CA samples)  
74 DNA Polymerase (1U) (New England Biolabs, M0530L, Ipswich, MA, USA). PCR amplification was carried  
75 out as follows: 98 °C (3:00) + [98 °C (0:15) + 50 °C (0:30) + 72 °C (0:30)] × 7 cycles + 72 °C (7:00).  
76 Amplified product (10µl) from each PCR reaction was combined and thoroughly mixed to create a single pool.  
77 The pooled amplicons were purified by adding Axygen AxyPrep MagPCR Clean-up beads (Corning, MAG-  
78 PCR-CL-50, Corning, NY, USA) at a 1:1 ratio to purify the final amplicons. The final amplicon library pool  
79 was evaluated using the Agilent Fragment Analyzer automated electrophoresis system (Agilent, Santa Clara,  
80 CA, USA), quantified using the Qubit HS dsDNA assay (ThermoFisher Scientific, Waltham, MA, USA), and  
81 diluted according to Illumina's standard protocol. The Illumina MiSeq instrument generated paired-end 300

It is made available under a [CC-BY 4.0 International license](https://creativecommons.org/licenses/by/4.0/) .

base pair reads (Illumina, San Diego, CA, USA). Adapter sequences were trimmed from the output sequences using Cutadapt. Sequencing reads were processed as previously described (14). VSEARCH tools merged paired reads and dereplicated sequences (30). Dereplicated sequences from RBD amplicons were mapped to the reference sequence of SARS-CoV-2 (NC\_045512.2) spike ORF using Minimap2 (29). Mapped amplicon sequences were then processed with SAM Refiner using the same spike sequence as a reference and the command line parameters “--Alpha 1.8 --foldab 0.6” (14). The haplotypes representing the Ohio lineages were rendered into figures using plotnine (<https://plotnine.org>).

### Phylogenetic Analysis

Phylogenetic trees were developed utilizing the software programs Nextclade (16) and UShER (15) using their default parameters. Each cryptic lineage had a consensus fasta file generated using the sequence reads containing cryptic-specific mutations (S5 Dataset). Non-cryptic specific mutations, which appeared at least 75% of the time in the same sequence read as a cryptic-specific mutation, are assumed to be part of the cryptic lineage and thus included in the consensus sequence. In positions where nucleotide mutations overlapped, the mutation with the highest abundance was chosen. If there was no coverage in a particular position or a mutation appeared ubiquitous in all samples, the designation “N” was used. To accurately generate the consensus sequence, only the last 35 positive cryptic lineage samples were used to create the consensus sequence. In Nextclade, consensus sequences were uploaded to the program, and each consensus was compared to the SARS-CoV-2 sequence (Wuhan-Hu-1/2019 (MN908947)). Using UShER, consensus sequences were copied onto the designated field and compared using the phylogenetic tree version “16,472,770 genomes from GISAID, GenBank, COG-UK and CNCB”.

## Reference

1. Bade R, Nadarajan D, Driver EM, Halden RU, Gerber C, Krotulski A, et al. Wastewater-based monitoring of the nitazene analogues: First detection of protonitazene in wastewater. *Science of The Total Environment*. 2024 Apr 10;920:170781.
2. Barber C, Crank K, Papp K, Innes GK, Schmitz BW, Chavez J, et al. Community-Scale Wastewater Surveillance of *Candida auris* during an Ongoing Outbreak in Southern Nevada. *Environ Sci Technol*. 2023 Jan 31;57(4):1755–63.
3. Corrin T, Rabeenthira P, Young KM, Mathiyalagan G, Baumeister A, Pussegoda K, et al. A scoping review of human pathogens detected in untreated human wastewater and sludge. *Journal of Water and Health*. 2024 Jan 16;jwh2024326.
4. Wurtzer S, Waldman P, Levert M, Cluzel N, Almayrac JL, Charpentier C, et al. SARS-CoV-2 genome quantification in wastewaters at regional and city scale allows precise monitoring of the whole outbreaks dynamics and variants spreading in the population. *Sci Total Environ*. 2022 Mar 1;810:152213.
5. Smyth DS, Trujillo M, Gregory DA, Cheung K, Gao A, Graham M, et al. Tracking cryptic SARS-CoV-2 lineages detected in NYC wastewater. *Nat Commun*. 2022 Feb 3;13(1):635.
6. Gregory DA, Trujillo M, Rushford C, Flury A, Kannoly S, San KM, et al. Genetic diversity and evolutionary convergence of cryptic SARS- CoV-2 lineages detected via wastewater sequencing. *PLoS Pathog*. 2022 Oct;18(10):e1010636.
7. Westcott CE, Sokoloski KJ, Rouchka EC, Chariker JH, Holm RH, Yeager RA, et al. The Detection of Periodic Reemergence Events of SARS-CoV-2 Delta Strain in Communities Dominated by Omicron. *Pathogens*. 2022 Oct 28;11(11):1249.
8. Shafer MM, Bobholz MJ, Vuyk WC, Gregory D, Roguet A, Soto LAH, et al. Human origin ascertained for SARS-CoV-2 Omicron-like spike sequences detected in wastewater: a targeted surveillance study of a cryptic lineage in an urban sewershed [Internet]. *medRxiv*; 2023 [cited 2024 Jan 8]. p. 2022.10.28.22281553. Available from: <https://www.medrxiv.org/content/10.1101/2022.10.28.22281553v5>

It is made available under a [CC-BY 4.0 International license](https://creativecommons.org/licenses/by/4.0/).

9. Haver A, Theijn R, Grift ID, Raaijmakers G, Poorter E, Laros JFJ, et al. Regional reemergence of a SARS-CoV-2 Delta lineage amid an Omicron wave detected by wastewater sequencing. *Sci Rep*. 2023 Oct 19;13(1):17870.
10. Domańska-Blicharz K, Oude Munnink BB, Orłowska A, Smreczak M, Opolska J, Lisowska A, et al. Cryptic SARS-CoV-2 lineage identified on two mink farms as a possible result of long-term undetected circulation in an unknown animal reservoir, Poland, November 2022 to January 2023. *Eurosurveillance* [Internet]. 2023 Apr 20 [cited 2024 May 21];28(16). Available from: <https://www.eurosurveillance.org/content/10.2807/1560-7917.ES.2023.28.16.2300188>
11. Conway MJ, Yang H, Revord LA, Novay MP, Lee RJ, Ward AS, et al. Chronic shedding of a SARS-CoV-2 Alpha variant in wastewater. *BMC Genomics*. 2024 Jan 13;25(1):59.
12. Wilkinson SAJ, Richter A, Casey A, Osman H, Mirza JD, Stockton J, et al. Recurrent SARS-CoV-2 mutations in immunodeficient patients. *Virus Evolution*. 2022 Jul 1;8(2):veac050.
13. Shafer MM, Bobholz MJ, Vuyk WC, Gregory DA, Roguet A, Haddock Soto LA, et al. Tracing the origin of SARS-CoV-2 omicron-like spike sequences detected in an urban sewershed: a targeted, longitudinal surveillance study of a cryptic wastewater lineage. *The Lancet Microbe*. 2024 Mar;S2666524723003725.
14. Gregory DA, Wieberg CG, Wenzel J, Lin CH, Johnson MC. Monitoring SARS-CoV-2 Populations in Wastewater by Amplicon Sequencing and Using the Novel Program SAM Refiner. *Viruses*. 2021 Aug 19;13(8):1647.
15. Turakhia Y, Thornlow B, Hinrichs AS, De Maio N, Gozashti L, Lanfear R, et al. Ultrafast Sample placement on Existing tRees (UShER) enables real-time phylogenetics for the SARS-CoV-2 pandemic. *Nat Genet*. 2021 Jun;53(6):809–16.
16. Aksamentov I, Roemer C, Hodcroft E, Neher R. Nextclade: clade assignment, mutation calling and quality control for viral genomes. *JOSS*. 2021 Nov 30;6(67):3773.
17. Greaney AJ, Starr TN, Gilchuk P, Zost SJ, Binshtein E, Loes AN, et al. Complete Mapping of Mutations to the SARS-CoV-2 Spike Receptor-Binding Domain that Escape Antibody Recognition. *Cell Host Microbe*.



2021 Jan 13;29(1):44-57.e9.

18. Starr TN, Greaney AJ, Addetia A, Hannon WW, Choudhary MC, Dingens AS, et al. Prospective mapping of viral mutations that escape antibodies used to treat COVID-19. *Science*. 2021 Feb 19;371(6531):850–4.
19. Li X, Cheng Z, Wang F, Chang J, Zhao Q, Zhou H, et al. A Negative Feedback Model to Explain Regulation of SARS-CoV-2 Replication and Transcription. *Frontiers in Genetics* [Internet]. 2021 [cited 2024 Feb 19];12. Available from: <https://www.frontiersin.org/journals/genetics/articles/10.3389/fgene.2021.641445>
20. Tengs T, Jonassen CM. Distribution and Evolutionary History of the Mobile Genetic Element s2m in Coronaviruses. *Diseases*. 2016 Jul 28;4(3):27.
21. Kofstad T, Jonassen CM. Screening of feral and wood pigeons for viruses harbouring a conserved mobile viral element: characterization of novel Astroviruses and Picornaviruses. *PLoS One*. 2011;6(10):e25964.
22. Tengs T, Delwiche CF, Monceyron Jonassen C. A genetic element in the SARS-CoV-2 genome is shared with multiple insect species. *J Gen Virol*. 2021 Mar;102(3):001551.
23. Imperatore JA, Cunningham CL, Pellegrine KA, Brinson RG, Marino JP, Evanseck JD, et al. Highly conserved s2m element of SARS-CoV-2 dimerizes via a kissing complex and interacts with host miRNA-1307-3p. *Nucleic Acids Research*. 2022 Jan 25;50(2):1017–32.
24. Jiang H, Joshi A, Gan T, Janowski AB, Fujii C, Bricker TL, et al. The Highly Conserved Stem-Loop II Motif Is Dispensable for SARS-CoV-2. *J Virol*. 2023 Jun 29;97(6):e0063523.
25. Pang H, Liu Y, Han X, Xu Y, Jiang F, Wu D, et al. Protective humoral responses to severe acute respiratory syndrome-associated coronavirus: implications for the design of an effective protein-based vaccine. *J Gen Virol*. 2004 Oct;85(Pt 10):3109–13.
26. Shi SQ, Peng JP, Li YC, Qin C, Liang GD, Xu L, et al. The expression of membrane protein augments the specific responses induced by SARS-CoV nucleocapsid DNA immunization. *Mol Immunol*. 2006



Apr;43(11):1791–8.

27. Heffron AS, McIlwain SJ, Amjadi MF, Baker DA, Khullar S, Armbrust T, et al. The landscape of antibody binding in SARS-CoV-2 infection. *PLOS Biology*. 2021 Jun 18;19(6):e3001265.
28. Patchett S, Lv Z, Rut W, Békés M, Drag M, Olsen SK, et al. A molecular sensor determines the ubiquitin substrate specificity of SARS-CoV-2 papain-like protease. *Cell Reports*. 2021 Sep 28;36(13):109754.
29. Li H. Minimap2: pairwise alignment for nucleotide sequences. *Bioinformatics*. 2018 Sep 15;34(18):3094–100.
30. Rognes T, Flouri T, Nichols B, Quince C, Mahé F. VSEARCH: a versatile open source tool for metagenomics. *PeerJ*. 2016;4:e2584.

**Table 1. Total number of cryptic lineages found using our SRA screen.**

| # of Samples | Cryptic Location | ID   | Coverage | Nextclade Derived | Usher Derived | Cryptic Lineages Detected     | Parent Circulated               |
|--------------|------------------|------|----------|-------------------|---------------|-------------------------------|---------------------------------|
| 3            | California       | CA-1 | 47.56%   | AY.103            | B.1.617.2     | September 2023                | May 2021 – January 2022         |
| 6            | Switzerland      | CH-1 | 44.41%   | B.1.416.1         |               | February – July 2021          | January 2020 – August 2020      |
| 5            | Colorado         | CO-1 | 11.43%   | AY.4              |               | December 2021 – March 2022    | January 2020 – August 2020      |
| 2            | Florida          | FL-1 | 20.13%   | B.1.533           |               | July 2022                     | May 2020 – June 2021            |
| 2            | Florida          | FL-2 | 25.44%   | AY.35             |               | December 2022 – January 2023  | June 2021 – August 2021         |
| 8            | Kentucky         | KY-1 | 38.75%   | AY.3              |               | February – June 2022          | June 2021 – December 2021       |
| 5            | Michigan         | MI-1 | 73.97%   | B.1.1.7           | B.1.1.7       | September 2022 – May 2023     | September 2020 – September 2021 |
| 20           | Netherlands      | NL-1 | 59.33%   | AY.43             | AY.43         | August – September 2022       | June 2021 – August 2021         |
| 15           | New York         | NY-1 | 63.47%   | B.1.2             | B.1.2         | October 2021 – February 2022  | May 2020 – June 2021            |
| 2            | New York         | NY-2 | 37.39%   | B.1.336           |               | July 2021                     | January 2020 – August 2020      |
| 4            | New York         | NY-3 | 35.96%   | B.1.503           |               | June – August 2021            | April 2020 – August 2020        |
| 3            | New York         | NY-4 | 22.83%   | D.2               |               | June – August 2023            | December 2020 – January 2021    |
| 6            | New York         | NY-5 | 35.58%   | B.1.623           |               | May – July 2023               | January 2021 – May 2021         |
| 4            | New York         | NY-6 | 24.17%   | B.1.1.7           |               | May – June 2023               | September 2020 – September 2021 |
| 4            | New York         | NY-7 | 21.46%   | R.1               |               | July – September 2023         | December 2020 – June 2021       |
| 38           | Ohio             | OH-1 | 44.38%   | B                 | B.1           | July 2022 – June 2023         | January 2020 – October 2021     |
| 48           | United Kingdom   | UK-1 | 50.28%   | B.1.566           | B.1           | November 2020 – February 2022 | January 2020 – October 2021     |
| 81           | Wisconsin        | WI-1 | 31.72%   | B.1.234           |               | April 2022 – August 2023      | June 2020 – April 2021          |

The phylogenetic software programs Nextclade and Usher were used to determine from which variant the cryptic lineages originated. The genomic coverage breadth varied greatly among the cryptic lineages, irrespective of the number sampled. The location where the most cryptic lineages were detected was in New York (seven cryptic lineages). Notably, all cryptic lineages were detected long after the parent lineage no longer circulated.

**A**

|         | Nucleotide | Amino Acid | Cryptic Samples |         |         |         |        |         |         |         |         |         |         |         |         |         |        |        |         | Cryptic Specific |         |    |   |
|---------|------------|------------|-----------------|---------|---------|---------|--------|---------|---------|---------|---------|---------|---------|---------|---------|---------|--------|--------|---------|------------------|---------|----|---|
|         |            |            | 2/16/21         | 5/24/21 | 5/25/21 | 6/14/21 | 7/3/21 | 7/11/21 | 2/16/21 | 2/16/21 | 5/24/21 | 5/24/21 | 5/25/21 | 5/25/21 | 6/14/21 | 6/14/21 | 7/3/21 | 7/3/21 | 7/11/21 |                  | 7/11/21 |    |   |
| A22812C | K417T      | 0%         | 0%              | 0%      | 0%      | 77%     | 7%     | 0%      | 0%      | 0%      | 0%      | 0%      | 0%      | 0%      | 0%      | 0%      | 0%     | 0%     | 0%      | 0%               | 0%      | 0% | + |
| T22896G | V445G      | 0%         | 0%              | 0%      | 12%     | 22%     | 94%    | 0%      | 0%      | 0%      | 0%      | 0%      | 0%      | 0%      | 0%      | 0%      | 0%     | 0%     | 0%      | 0%               | 0%      | 0% | + |
| A22910G | N450D      | 10%        | 33%             | 7%      | 100%    | 97%     | 100%   | 0%      | 0%      | 0%      | 0%      | 0%      | 0%      | 0%      | 0%      | 0%      | 0%     | 0%     | 0%      | 0%               | 0%      | 0% | + |
| T22942G | N460K      | 0%         | 33%             | 7%      | 98%     | 97%     | 100%   | 0%      | 0%      | 11%     | 0%      | 0%      | 33%     | 0%      | 0%      | 0%      | 0%     | 0%     | 0%      | 0%               | 0%      | 0% | - |
| C23271A | A570D      | 0%         | 51%             | 100%    | 25%     | 0%      | 0%     | 0%      | 11%     | 71%     | 71%     | 73%     | 97%     | 60%     | 99%     | 27%     | 0%     | 0%     | 0%      | 0%               | 0%      | 0% | - |
| G23006A | G482S      | 0%         | 32%             | 6%      | 96%     | 96%     | 99%    | 0%      | 0%      | 0%      | 0%      | 0%      | 0%      | 0%      | 0%      | 0%      | 0%     | 0%     | 0%      | 0%               | 0%      | 0% | + |
| G23012A | E484K      | 9%         | 32%             | 6%      | 98%     | 96%     | 99%    | 0%      | 0%      | 0%      | 0%      | 0%      | 0%      | 0%      | 0%      | 0%      | 0%     | 0%     | 0%      | 0%               | 0%      | 0% | + |
| G23016A | G485D      | 0%         | 32%             | 6%      | 98%     | 96%     | 98%    | 0%      | 0%      | 0%      | 0%      | 0%      | 0%      | 0%      | 0%      | 0%      | 0%     | 0%     | 0%      | 0%               | 0%      | 0% | + |
| T23042C | S494P      | 9%         | 32%             | 6%      | 98%     | 96%     | 100%   | 0%      | 0%      | 0%      | 0%      | 0%      | 0%      | 0%      | 0%      | 0%      | 0%     | 0%     | 0%      | 0%               | 0%      | 0% | + |
| A23055G | Q498R      | 0%         | 0%              | 0%      | 98%     | 99%     | 100%   | 0%      | 0%      | 0%      | 0%      | 0%      | 0%      | 0%      | 0%      | 0%      | 0%     | 0%     | 0%      | 0%               | 0%      | 0% | + |
| A23063T | N501Y      | 88%        | 99%             | 100%    | 100%    | 98%     | 98%    | 46%     | 0%      | 94%     | 67%     | 75%     | 86%     | 0%      | 99%     | 0%      | 0%     | 0%     | 0%      | 0%               | 0%      | 0% | - |
| A23403G | D614G      | 0%         | 98%             | 99%     | 88%     | 99%     | 100%   | 0%      | 97%     | 69%     | 63%     | 74%     | 97%     | 89%     | 99%     | 83%     | 100%   | 75%    | 0%      | 0%               | 0%      | 0% | - |
| C23709T | T716I      | 66%        | 98%             | 98%     | 1%      | 0%      | 0%     | 66%     | 45%     | 72%     | 85%     | 100%    | 79%     | 0%      | 99%     | 0%      | 0%     | 0%     | 0%      | 0%               | 0%      | 0% | - |
| G24914C | D1118H     | 70%        | 98%             | 79%     | 0%      | 0%      | 14%    | 45%     | 96%     | 63%     | 55%     | 60%     | 62%     | 36%     | 99%     | 21%     | 0%     | 13%    | 0%      | 0%               | 0%      | 0% | - |

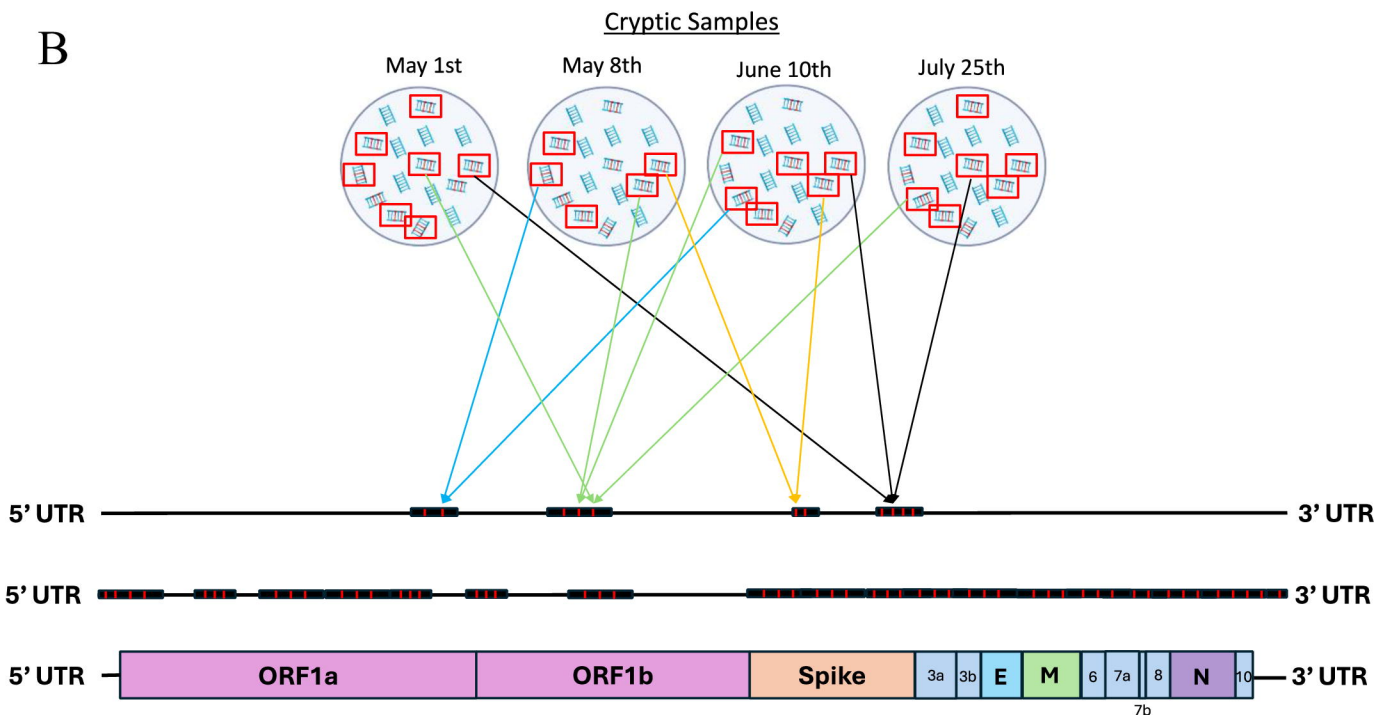

**Fig 1. Schematic of workflow.**

Samples from sewer shed facilities containing cryptic lineages (yellow) were compared against samples from neighboring sewer sheds that did not contain cryptic lineages (orange). (A) Using the CH-1 cryptic lineage as an example, mutations found in at least two cryptic samples, with a prevalence of 50x more in the cryptic samples, are tentatively considered cryptic-specific (green). (B) The sequence reads containing cryptic-specific mutations (red box) were mapped onto the SARS-CoV-2 genome, with varying coverage across the genome to create a consensus sequence (middle genome). To be mapped onto the genome, a cryptic-specific sequence must appear in two or more samples.

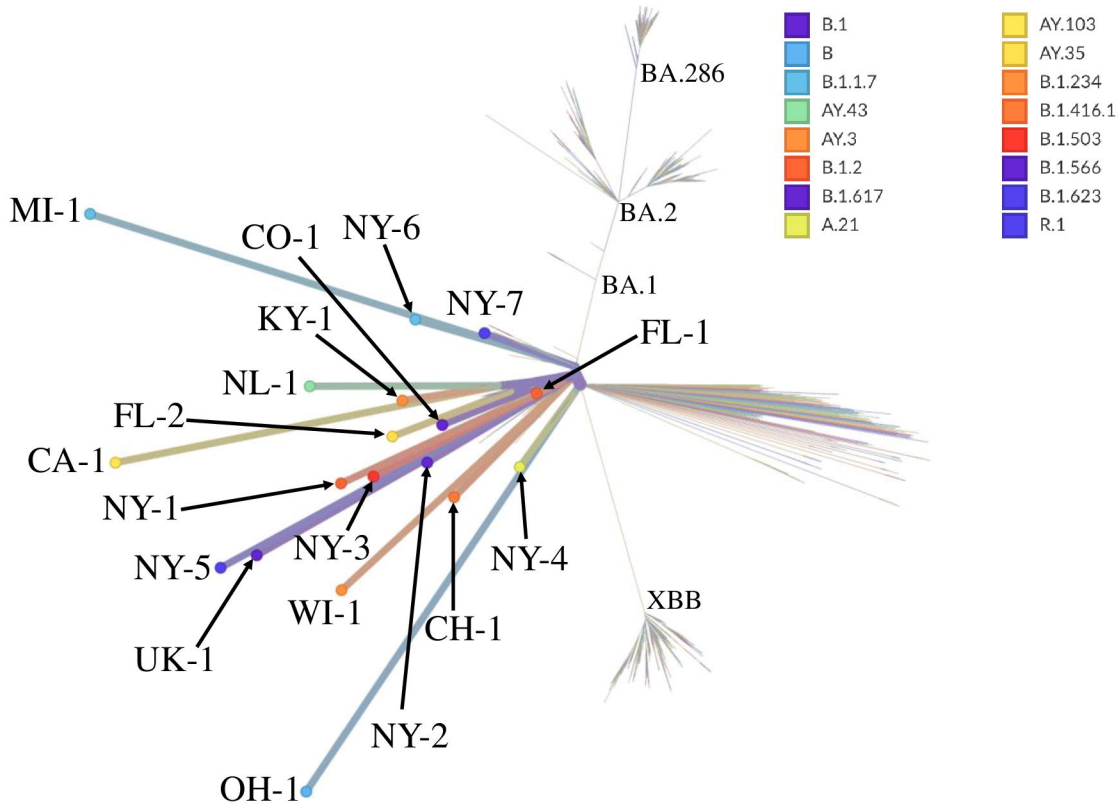

**Fig 2. Generated phylogenetics tree using assemblies.**

The phylogenetic tree generated by NextClade illustrates the diversity of the cryptic lineages. The consensus sequences were uploaded onto Nextclade and compared against the Wuhan-Hu-1/2019 (MN908947). The phylogenetic tree highlights the diversity among the cryptic lineages detected.

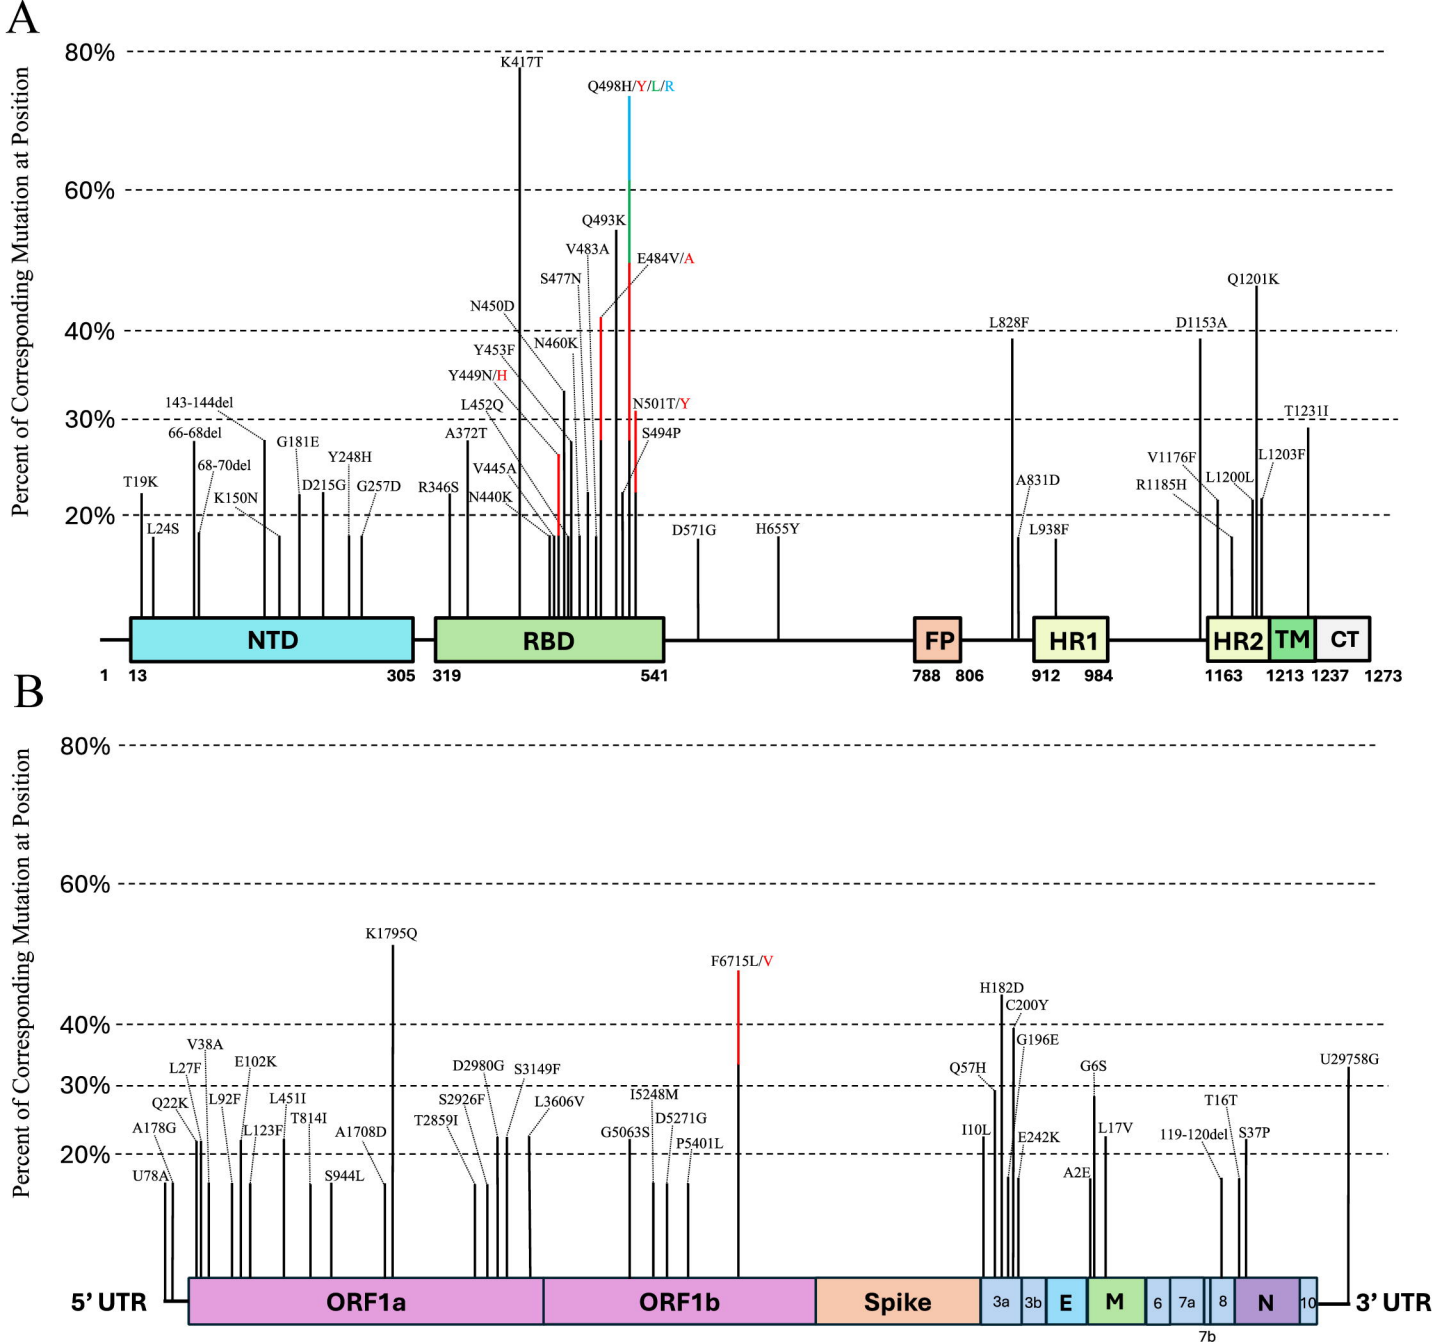



|                                   |
|-----------------------------------|
| Original SARS-CoV-2 Amino Acid    |
| Consensus Sarbecovirus Amino Acid |
| Other Amino Acid                  |

| Bat Sarbecovirus |          |          |         |          |           |           |           |           | SARS-CoV-2 Cryptic Lineages |      |      |      |      |      |      |      |      |      |      |      |      |      |      | Reversion in |      |      |       |                                  |                                  |
|------------------|----------|----------|---------|----------|-----------|-----------|-----------|-----------|-----------------------------|------|------|------|------|------|------|------|------|------|------|------|------|------|------|--------------|------|------|-------|----------------------------------|----------------------------------|
| Amino Acid       | Position | Rp YN986 | RAYC-13 | BANAL-52 | BANAL-103 | BANAL-116 | BANAL-236 | BANAL-247 | SARS-CoV-2                  | CA-1 | CB-1 | CO-1 | FL-1 | FL-2 | KY-1 | ML-1 | NL-1 | NY-1 | NY-2 | NY-3 | NY-4 | NY-5 | NY-6 | NY-7         | OR-1 | UK-1 | WL-1  | Reversion in<br>Patent Sequences | Reversion in<br>Cryptic Lineages |
| ORF1a            | 38       | A        | A       | A        | A         | A         | A         | A         | V                           | A    | V    | -    | V    | -    | V    | V    | V    | A    | V    | V    | V    | V    | -    | -            | A    | V    | A     | 0.0%                             | 22.2%                            |
|                  | 280      | T        | T       | T        | T         | T         | T         | T         | I                           | -    | -    | -    | -    | -    | I    | -    | -    | I    | I    | I    | -    | -    | -    | -            | -    | -    | -     | 0.0%                             | 0.0%                             |
|                  | 376      | P        | P       | P        | P         | P         | P         | P         | S                           | -    | -    | -    | -    | -    | -    | -    | -    | -    | S    | -    | -    | -    | -    | -            | -    | -    | -     | 0.0%                             | 0.0%                             |
|                  | 859      | T        | T       | T        | T         | T         | T         | T         | A                           | A    | A    | -    | -    | -    | A    | A    | -    | -    | D    | -    | -    | -    | -    | -            | -    | A    | 0.0%  | 0.0%                             |                                  |
|                  | 1629     | A        | A       | A        | A         | A         | A         | A         | V                           | V    | -    | -    | V    | V    | -    | G    | -    | V    | V    | -    | -    | -    | -    | -            | V    | V    | -     | 0.0%                             | 0.0%                             |
|                  | 1733     | N        | N       | N        | N         | N         | N         | N         | S                           | S    | S    | -    | -    | -    | S    | -    | -    | -    | S    | -    | -    | -    | S    | -            | -    | -    | S     | 0.0%                             | 0.0%                             |
|                  | 1779     | L        | L       | L        | L         | L         | L         | L         | F                           | F    | F    | -    | F    | F    | -    | F    | F    | F    | F    | L    | F    | F    | F    | F            | F    | L    | 0.0%  | 11.1%                            |                                  |
|                  | 1795     | Q        | Q       | Q        | Q         | Q         | Q         | Q         | K                           | K    | K    | -    | Q    | K    | -    | Q    | -    | K    | Q    | Q    | -    | Q    | Q    | K            | Q    | Q    | Q     | 0.8%                             | 50.0%                            |
|                  | 1822     | I        | I       | I        | I         | I         | I         | I         | T                           | T    | T    | -    | T    | T    | -    | T    | -    | T    | T    | T    | -    | -    | T    | -            | T    | -    | T     | 0.6%                             | 0.0%                             |
|                  | 2033     | T        | T       | T        | T         | T         | T         | T         | A                           | A    | A    | -    | -    | -    | A    | -    | -    | -    | A    | A    | -    | -    | -    | -            | -    | A    | 0.0%  | 0.0%                             |                                  |
| 2082             | D        | D        | D       | D        | D         | D         | D         | N         | N                           | -    | -    | -    | -    | N    | N    | -    | -    | N    | N    | -    | N    | N    | -    | -            | N    | N    | 0.0%  | 0.0%                             |                                  |
| 2405             | T        | T        | T       | T        | T         | T         | T         | N         | N                           | -    | -    | -    | -    | S    | -    | -    | -    | -    | -    | -    | -    | N    | N    | N            | N    | -    | 0.0%  | 0.0%                             |                                  |
| 3143             | V        | V        | V       | V        | V         | V         | V         | A         | -                           | -    | -    | -    | A    | -    | -    | A    | A    | -    | A    | -    | -    | -    | -    | V            | A    | A    | 1.5%  | 5.6%                             |                                  |
| 3606             | V        | V        | V       | V        | V         | V         | V         | L         | V                           | -    | -    | L    | L    | F    | V    | L    | -    | L    | -    | V    | L    | L    | F    | -            | V    | 0.0% | 22.2% |                                  |                                  |
| ORF1ab           | 6710     | S        | S       | S        | S         | S         | S         | F         | F                           | F    | -    | F    | F    | F    | F    | -    | F    | -    | F    | -    | F    | F    | F    | F            | S    | 0.0% | 5.6%  |                                  |                                  |
|                  | 6715     | L        | L       | L        | L         | L         | L         | F         | F                           | F    | -    | L    | -    | L    | L    | V    | -    | L    | -    | C    | L    | L    | L    | L            | L    | L    | 0.0%  | 50.0%                            |                                  |
| Spike            | 50       | L        | L       | L        | L         | L         | L         | L         | S                           | -    | S    | -    | -    | S    | S    | S    | S    | S    | L    | S    | S    | S    | S    | S            | S    | S    | 0.0%  | 5.6%                             |                                  |
|                  | 372      | T        | T       | T        | T         | T         | T         | A         | -                           | A    | A    | T    | -    | A    | T    | A    | A    | T    | -    | A    | A    | A    | -    | T            | T    | A    | 0.0%  | 27.8%                            |                                  |
|                  | 519      | N        | N       | N        | N         | N         | N         | N         | H                           | -    | H    | H    | -    | H    | H    | H    | H    | H    | N    | Q    | Q    | -    | H    | H            | H    | Q    | 0.0%  | 5.6%                             |                                  |
| ORF3a            | 10       | L        | L       | L        | L         | L         | L         | L         | I                           | L    | -    | -    | I    | I    | I    | I    | I    | I    | L    | -    | I    | I    | -    | I            | L    | I    | 0.0%  | 22.2%                            |                                  |
|                  | 28       | S        | S       | S        | S         | S         | S         | S         | F                           | F    | F    | -    | F    | F    | F    | F    | F    | F    | F    | -    | F    | -    | F    | F            | F    | F    | 0.0%  | 0.0%                             |                                  |
|                  | 259      | A        | A       | A        | A         | A         | A         | A         | V                           | -    | V    | -    | V    | V    | V    | V    | V    | -    | V    | -    | -    | -    | -    | V            | V    | -    | 0.0%  | 0.0%                             |                                  |
| ORF7a            | 104      | I        | I       | I        | I         | I         | I         | V         | V                           | V    | -    | -    | V    | V    | V    | V    | -    | -    | -    | V    | -    | -    | V    | V            | -    | -    | 0.0%  | 0.0%                             |                                  |
| ORF7b            | 2        | S        | S       | S        | S         | S         | S         | S         | I                           | I    | I    | -    | -    | I    | I    | I    | I    | -    | -    | -    | I    | -    | -    | I            | -    | -    | 0.0%  | 0.0%                             |                                  |
| N                | 37       | P        | P       | P        | P         | P         | P         | P         | S                           | S    | S    | -    | -    | S    | S    | P    | P    | S    | -    | -    | -    | S    | -    | S            | P    | -    | 0.1%  | 22.2%                            |                                  |
|                  | 267      | Q        | Q       | Q        | Q         | Q         | Q         | Q         | A                           | A    | -    | -    | A    | -    | A    | A    | A    | A    | -    | A    | -    | -    | A    | A            | -    | A    | -     | 0.0%                             | 0.0%                             |

Convergent

**Fig 4. Chart of SARS-CoV-2 amino acids that deviate from the consensus Sarbecovirus amino acid sequence.**

Ubiquitous amino acids found across seven bat Sarbecoviruses (orange) highlight the occurrence of cryptic lineages to revert the SARS-CoV-2 (yellow) amino acid to the bat Sarbecovirus. The amino acid positions where a change is observed but differ from the Sarbecoviruses and SARS-CoV-2 are highlighted in blue. Instances where the same amino acid reversion occurred in  $\geq 3$  cryptic lineages are designated as convergent.

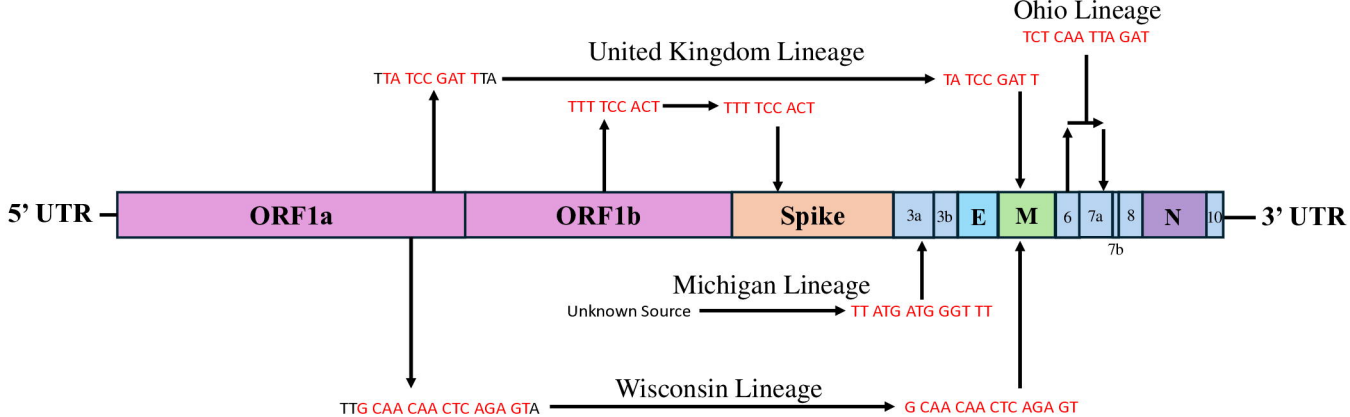

**Fig 5. Insertion sequences were mainly derived from duplications.**

Insertion sites were mapped onto the SARS-CoV-2 genome to visually represent where the duplicated sequence (red) occurred and where the insertion was detected with respect to the cryptic lineage.

|      |      |      |      |      |      |      |      |      |      |      |      |      |      |      |      |      |      |      |      |      | Sewershed 1 |      |      |         |         |         |         |         |
|------|------|------|------|------|------|------|------|------|------|------|------|------|------|------|------|------|------|------|------|------|-------------|------|------|---------|---------|---------|---------|---------|
|      |      |      |      |      |      |      |      |      |      |      |      |      |      |      |      |      |      |      |      |      | Sewershed 2 |      |      |         |         |         |         |         |
| K    | D    | S    | F    | T    | V    | T    |      | T    |      | N    | M    |      | N    | Δ/V  |      | Y    | K    | P    | V    | H/Y  |             | T    | Y    |         |         |         |         |         |
| K    | D    | S    | F    | T    | V    | T    |      | T    | A    | N    | M    |      | N    | Δ/V  |      | Y    | K    | P    | V    | H/Y  |             | T    | Y    |         |         |         |         |         |
| K    | D    | S    | F    | T    | V    | T    |      | T    | A    | N    | M    |      | N    | V    |      | Y    | K    | P    | V    | H/Y  |             | T    | Y    |         |         |         |         |         |
| K    | D    | S    | F    | T    | V    | T    |      | T    |      | N    | M    |      | N    | V    |      | Y    | K    | P    | V    | H/Y  |             | T    | Y    |         |         |         |         |         |
| K    | D    | S    | F    | T    | V    | T    | K    | T    | A    | N    | M    | K    | N    | V    | P    | Y    | T    |      | V    | H/Y  | T           | T    |      |         |         |         |         |         |
|      |      |      |      |      |      |      |      |      |      | N    |      | K    | N    | V    | H/P  | Y    | T    |      | V    | H    | T           | T    |      |         |         |         |         |         |
|      | D    | S    | F    | T    | V    |      |      | T    |      |      |      |      | N    | V    | H    |      | K/T  | P    | V    | H/Y  | T           | T    | Y    |         |         |         |         |         |
|      | D    | S    | F    | T    | V    |      |      |      |      |      |      |      | N    | V    | P    | Y    | T    |      | V    | H    | T           | T    |      |         |         |         |         |         |
| K    | D    | S    | F    | T    | V    | T    | K    | T    | A    | K    | M    | K    | N    | Δ    | P    | Y    | T    |      | V    | H    | T           | T    |      |         |         |         |         |         |
| K    | D    | S    | F    | T    | V    | T    | K    | T    | A    | K    | M    | K    | N    | Δ    | P    | Y    | T    |      | V    | H    | T           | T    |      |         |         |         |         |         |
| R346 | N354 | R357 | V367 | A372 | V407 | K417 | N439 | K444 | G446 | Y449 | L455 | N460 | S477 | E484 | F486 | F490 | Q493 | S494 | G496 | Q498 | P499        | N501 | Y505 | 9-06-22 | 9-11-22 | 3-12-23 | 4-02-23 | 6-04-23 |

**Fig 6. Cryptic-specific RBD mutations over time for the OH-1 cryptic lineage.**

Both locations shared highly similar mutation profiles in the RBD, with distinct mutations appearing in both locations around the same time (N460K, F486P, & P499T). Empty cells signify areas of low or no coverage.
